# Supplementary material for: Thermally activated surface oxygen defects at the perimeter of Au/TiO2: a DFT+U study
Source: Royal Society of Chemistry journal article supplement (doi:10.1039/c5cp04113a), 2015-01-01
Supplement: c5cp04113a1.pdf [file c5cp04113a1.pdf]

SP-Info\_O-vacancy

Electronic Energy and frequencies for formation of interface vacancy on Au<sub>3</sub>/TiO<sub>2</sub> system.

The data could be used to reproduce the results using our papers as cited in the article.

electronic energy is in kJ/mol

| Stoichiometric Au <sub>3</sub> /TiO <sub>2</sub> |             |         | Reduced Au <sub>3</sub> /TiO <sub>2</sub> |             |         |
|--------------------------------------------------|-------------|---------|-------------------------------------------|-------------|---------|
| Electronic Energy                                | -4550681.45 |         | Electronic Energy                         | -4508473.57 |         |
|                                                  | Frequencies |         |                                           | Frequencies |         |
|                                                  | [cm-1]      | [THz]   |                                           | [cm-1]      | [THz]   |
| 1                                                | 0.39        | 0.0118  | 1                                         | 11.06       | 0.3314  |
| 2                                                | 9.6         | 0.2877  | 2                                         | 21.63       | 0.6484  |
| 3                                                | 33.48       | 1.0036  | 3                                         | 34.53       | 1.0352  |
| 4                                                | 54          | 1.619   | 4                                         | 75.28       | 2.2568  |
| 5                                                | 65.51       | 1.9639  | 5                                         | 92.83       | 2.7829  |
| 6                                                | 71.02       | 2.1291  | 6                                         | 96.67       | 2.898   |
| 7                                                | 99.6        | 2.986   | 7                                         | 119.13      | 3.5716  |
| 8                                                | 131.22      | 3.9337  | 8                                         | 146.76      | 4.3997  |
| 9                                                | 148.23      | 4.4438  | 9                                         | 172.8       | 5.1804  |
| 10                                               | 229.1       | 6.8683  | 10                                        | 231.6       | 6.9433  |
| 11                                               | 269.01      | 8.0647  | 11                                        | 237.51      | 7.1203  |
| 12                                               | 285.97      | 8.5732  | 12                                        | 244         | 7.315   |
| 13                                               | 293.13      | 8.7877  | 13                                        | 258.59      | 7.7523  |
| 14                                               | 304.95      | 9.142   | 14                                        | 264.63      | 7.9335  |
| 15                                               | 316.05      | 9.475   | 15                                        | 277.01      | 8.3047  |
| 16                                               | 319.94      | 9.5915  | 16                                        | 288.07      | 8.6361  |
| 17                                               | 328.32      | 9.8428  | 17                                        | 321.87      | 9.6494  |
| 18                                               | 335.3       | 10.052  | 18                                        | 331.72      | 9.9446  |
| 19                                               | 336.79      | 10.0966 | 19                                        | 340.22      | 10.1996 |
| 20                                               | 343.23      | 10.2898 | 20                                        | 348.79      | 10.4564 |
| 21                                               | 345.03      | 10.3438 | 21                                        | 365.94      | 10.9707 |
| 22                                               | 352.85      | 10.5781 | 22                                        | 380.22      | 11.3988 |
| 23                                               | 360.24      | 10.7996 | 23                                        | 385.45      | 11.5554 |
| 24                                               | 368.18      | 11.0379 | 24                                        | 395.98      | 11.8712 |
| 25                                               | 378.44      | 11.3455 | 25                                        | 403.24      | 12.0887 |
| 26                                               | 380.89      | 11.4188 | 26                                        | 425.48      | 12.7557 |
| 27                                               | 394.59      | 11.8294 | 27                                        | 433.53      | 12.9968 |
| 28                                               | 395.62      | 11.8605 | 28                                        | 442.52      | 13.2664 |
| 29                                               | 417.3       | 12.5104 | 29                                        | 482.84      | 14.4752 |
| 30                                               | 423.12      | 12.6848 | 30                                        | 486.35      | 14.5803 |
| 31                                               | 426.65      | 12.7907 | 31                                        | 493.1       | 14.7828 |
| 32                                               | 457.96      | 13.7292 | 32                                        | 503.54      | 15.0957 |
| 33                                               | 460.22      | 13.7969 | 33                                        | 508.34      | 15.2396 |
| 34                                               | 462.64      | 13.8695 | 34                                        | 520.2       | 15.5952 |
| 35                                               | 472.78      | 14.1735 | 35                                        | 529.51      | 15.8743 |
| 36                                               | 483.31      | 14.4893 | 36                                        | 532.33      | 15.9588 |
| 37                                               | 496.43      | 14.8826 | 37                                        | 702.11      | 21.0487 |
| 38                                               | 512.54      | 15.3655 | 38                                        | 707.15      | 21.1999 |
| 39                                               | 567.3       | 17.0072 | 39                                        | 726.09      | 21.7676 |
| 40                                               | 576.96      | 17.2968 | 40                                        | 737.23      | 22.1015 |
| 41                                               | 588.72      | 17.6493 | 41                                        | 748.04      | 22.4258 |
| 42                                               | 589.74      | 17.6799 | 42                                        | 769.48      | 23.0686 |

SP-Info\_O-vacancy

|    |        |         |    |         |         |
|----|--------|---------|----|---------|---------|
| 43 | 599.14 | 17.9618 | 43 | 783.03  | 23.4746 |
| 44 | 606    | 18.1673 | 44 | 794.55  | 23.8199 |
| 45 | 616.72 | 18.4887 | 45 | 800.8   | 24.0074 |
| 46 | 618.4  | 18.5392 | 46 | 806.78  | 24.1867 |
| 47 | 624.69 | 18.7277 | 47 | 814.91  | 24.4304 |
| 48 | 629.96 | 18.8857 | 48 | 819.22  | 24.5596 |
| 49 | 630.6  | 18.9048 | 49 | 827.69  | 24.8135 |
| 50 | 637.77 | 19.1199 | 50 | 832.8   | 24.9667 |
| 51 | 645.63 | 19.3556 | 51 | 841.73  | 25.2343 |
| 52 | 650.02 | 19.4871 | 52 | 847.67  | 25.4125 |
| 53 | 666.85 | 19.9918 | 53 | 852.39  | 25.5539 |
| 54 | 674.38 | 20.2175 | 54 | 865.69  | 25.9528 |
| 55 | 677.28 | 20.3044 | 55 | 866.17  | 25.9673 |
| 56 | 703.79 | 21.0992 | 56 | 871.47  | 26.1259 |
| 57 | 707.12 | 21.1988 | 57 | 874.96  | 26.2306 |
| 58 | 711.62 | 21.3339 | 58 | 878.37  | 26.3328 |
| 59 | 713.81 | 21.3994 | 59 | 882.18  | 26.447  |
| 60 | 718.09 | 21.5277 | 60 | 886.48  | 26.5761 |
| 61 | 718.93 | 21.5529 | 61 | 892.01  | 26.7417 |
| 62 | 727.88 | 21.8212 | 62 | 894.45  | 26.8149 |
| 63 | 729.79 | 21.8785 | 63 | 901.97  | 27.0404 |
| 64 | 733.38 | 21.9862 | 64 | 913.07  | 27.3733 |
| 65 | 741.42 | 22.2272 | 65 | 916.03  | 27.462  |
| 66 | 742.01 | 22.245  | 66 | 920.87  | 27.6069 |
| 67 | 744.23 | 22.3114 | 67 | 930.56  | 27.8975 |
| 68 | 750.47 | 22.4987 | 68 | 936.01  | 28.0609 |
| 69 | 750.63 | 22.5034 | 69 | 942.2   | 28.2464 |
| 70 | 759.92 | 22.7818 | 70 | 949.52  | 28.466  |
| 71 | 760.84 | 22.8094 | 71 | 963.38  | 28.8813 |
| 72 | 762.55 | 22.8606 | 72 | 969.64  | 29.069  |
| 73 | 780.37 | 23.3949 | 73 | 971.86  | 29.1357 |
| 74 | 784.4  | 23.5158 | 74 | 981.89  | 29.4364 |
| 75 | 786.1  | 23.5667 | 75 | 992.87  | 29.7656 |
| 76 | 806.53 | 24.1792 | 76 | 995.09  | 29.832  |
| 77 | 819.94 | 24.5812 | 77 | 1003.32 | 30.0789 |
| 78 | 823.61 | 24.6913 | 78 | 1030.34 | 30.8889 |
| 79 | 826.51 | 24.7781 | 79 | 1038.17 | 31.1235 |
| 80 | 828.45 | 24.8362 | 80 | 1040.76 | 31.2011 |
| 81 | 838.69 | 25.1432 | 81 | 1051.77 | 31.5314 |
| 82 | 858.89 | 25.7487 | 82 | 1060.54 | 31.7942 |
| 83 | 896.66 | 26.8813 | 83 | 1083.09 | 32.4702 |
| 84 | 914.65 | 27.4205 | 84 | 1094.51 | 32.8127 |
| 85 | 919.15 | 27.5554 | 85 | 1125.09 | 33.7295 |
| 86 | 937.11 | 28.0939 | 86 | 1147.08 | 34.3885 |
| 87 | 951.06 | 28.5122 | 87 | 1173.24 | 35.1728 |
| 88 | 974.52 | 29.2155 |    |         |         |
| 89 | 984.07 | 29.5017 |    |         |         |
| 90 | 992.15 | 29.744  |    |         |         |

O<sub>2</sub>  
**Electronic Energy** -83988.6561  
**Frequencies**  
[cm-1] 1484.81
